# Supplementary material for: A strong and tough gelatin/polyvinyl alcohol double network hydrogel actuator with superior actuation strength and fast actuation speed
Source: Royal Society of Chemistry journal article supplement (doi:10.1039/d2sm01342h), 2022-01-01
Supplement: d2sm01342h1.pdf [file d2sm01342h1.pdf]

## Supporting Information

A strong and tough gelatin/polyvinyl alcohol double network  
hydrogel actuator with superior actuation strength and fast  
actuation speed

~~Yao~~-Shiyu Yao,<sup>a</sup> ~~Sun~~-Xingyue Sun,<sup>b</sup> ~~Ye~~-Lina Ye,<sup>\*c</sup> and ~~Liang~~-Haiyi  
Liang<sup>\*bde</sup>

<sup>a</sup>*School of Chemistry and Chemical Engineering, Anhui University, Hefei, Anhui  
230601, China.*

<sup>b</sup>*CAS Key Laboratory of Mechanical Behavior and Design of Materials, Department  
of Modern Mechanics, University of Science and Technology of China, Hefei, Anhui  
230026, China.*

<sup>c</sup>*School of Material Science and Engineering, Anhui University, Hefei, Anhui 230601,  
China. Email Address: 12010@ahu.edu.cn*

<sup>d</sup>*School of Civil Engineering, Anhui Jianzhu University, Hefei 230601, China. Email  
Address: hyliang@ustc.edu.cn*

<sup>e</sup>*IAT-Chungu Joint Laboratory for Additive Manufacturing, Anhui Chungu 3D  
printing Institute of Intelligent Equipment and Industrial Technology, Wuhu, Anhui  
241200, China.*

Email: 12010@ahu.edu.cn; hyliang@ustc.edu.cn

Phone: +86 (0)551 63601622. Fax: +86 (0)551 63606459

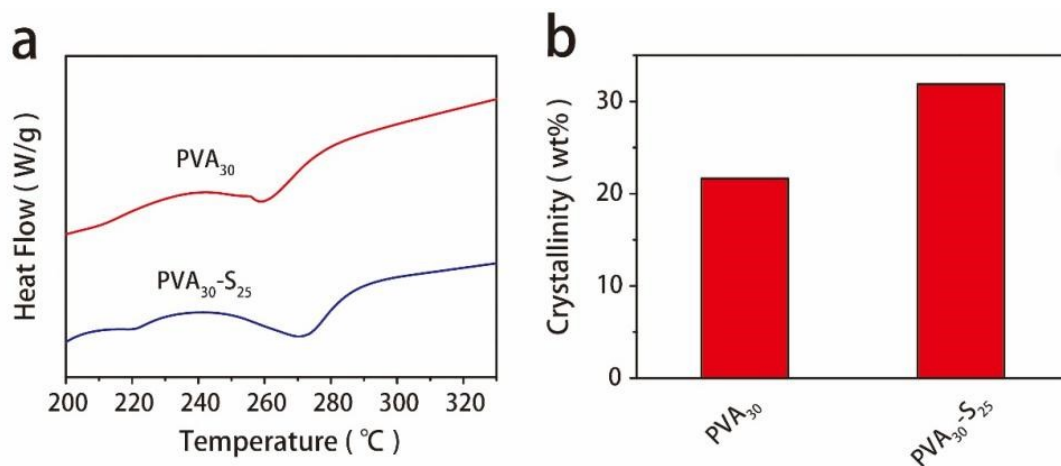

**Fig.S1. (a) DSC curves of the PVA<sub>30</sub> gel and the PVA<sub>30</sub>-S<sub>25</sub> gel. The PVA<sub>30</sub> gel was fabricated with 30 wt% PVA powder through the heating-cooling and freezing-thawing treatment. (b) The crystallinity of the PVA<sub>30</sub> gel and the PVA<sub>30</sub>-S<sub>25</sub> gel.**

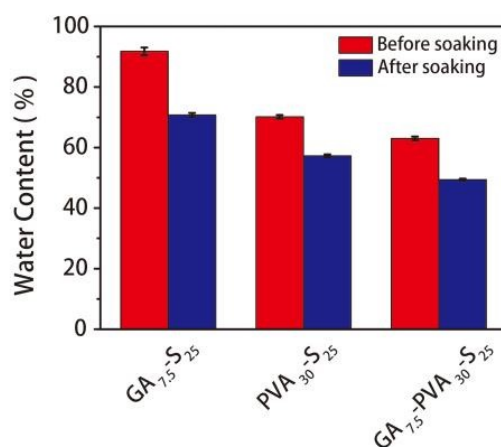

**Fig.S2. Water content of the GA<sub>7.5</sub>-S<sub>25</sub> gel, the PVA<sub>30</sub>-S<sub>25</sub> gel, and the GA<sub>7.5</sub>-PVA<sub>30</sub>-S<sub>25</sub> gel before immersing in the (NH<sub>4</sub>)<sub>2</sub>SO<sub>4</sub> solution and after immersing in the (NH<sub>4</sub>)<sub>2</sub>SO<sub>4</sub> solution.**

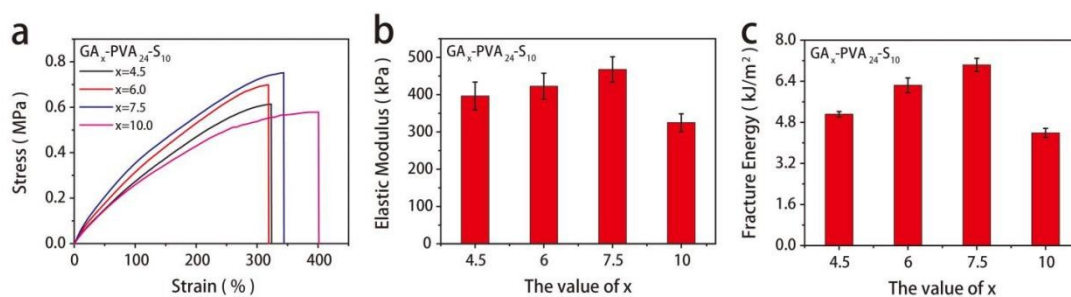

**Fig.S3. (a) Tensile stress-strain curves of the GA<sub>x</sub>-PVA<sub>24</sub>-S<sub>10</sub> gel with various weight**

percentages of gelatin. (b) Elastic modulus of the  $\text{GA}_x\text{-PVA}_{24}\text{-S}_{10}$  gel. (c) Fracture energy of the  $\text{GA}_x\text{-PVA}_{24}\text{-S}_{10}$  gel.

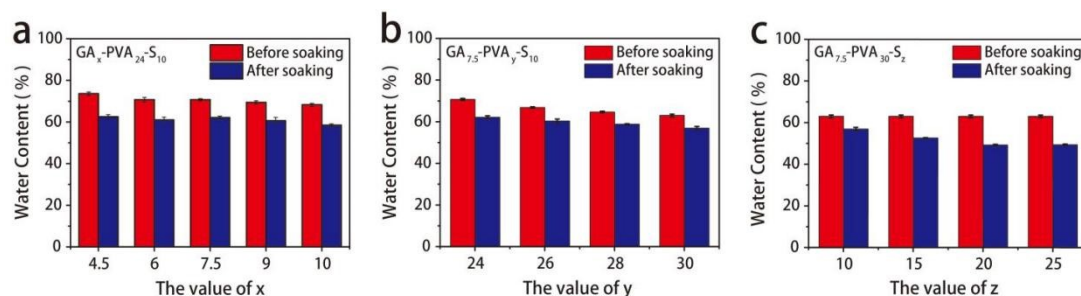

**Fig.S4.** (a) Water content of the  $\text{GA}_x\text{-PVA}_{24}\text{-S}_{10}$  gel before immersing in the  $(\text{NH}_4)_2\text{SO}_4$  solution and after immersing in the  $(\text{NH}_4)_2\text{SO}_4$  solution. (b) Water content of the  $\text{GA}_{7.5}\text{-PVA}_y\text{-S}_{10}$  gel. (c) Water content of the  $\text{GA}_{7.5}\text{-PVA}_{30}\text{-S}_z$  gel.

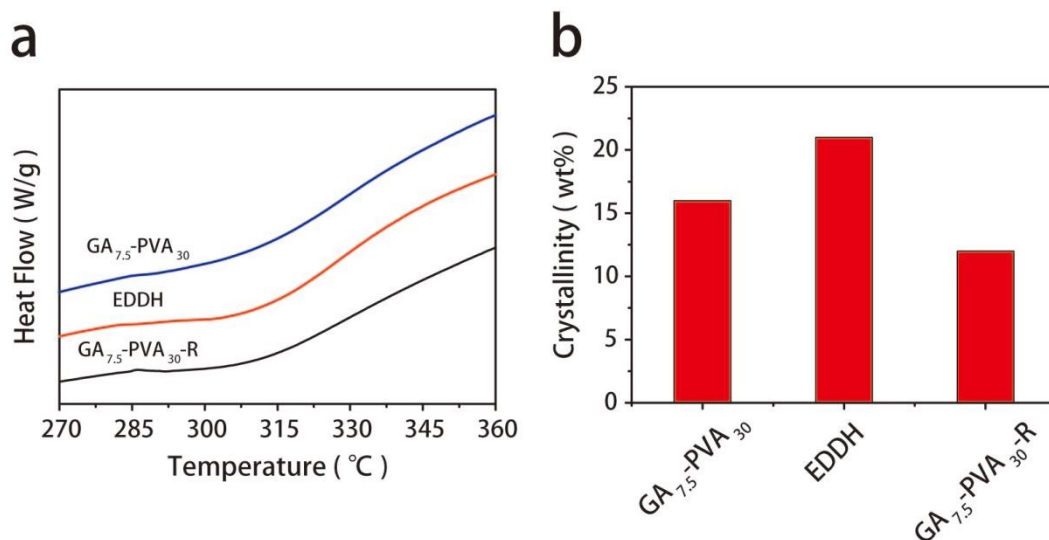

**Fig.S5.** (a) DSC curves of the  $\text{GA}_{7.5}\text{-PVA}_{30}$  gel, the EDDH and the  $\text{GA}_{7.5}\text{-PVA}_{30}\text{-R}$  gel. (b) The crystallinity of the  $\text{GA}_{7.5}\text{-PVA}_{30}$  gel, the EDDH and the  $\text{GA}_{7.5}\text{-PVA}_{30}\text{-R}$  gel.

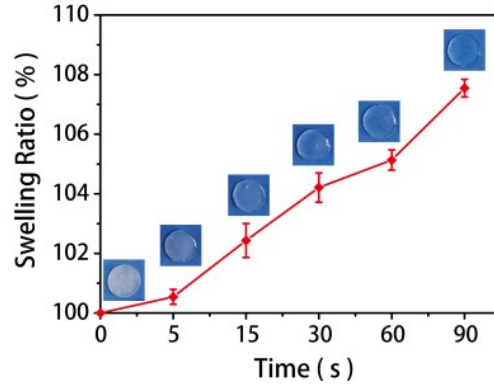

Fig.S6. Swelling ratio of GA<sub>7.5</sub>-PVA<sub>30</sub>-S<sub>25</sub> gel as a function of time under the stimulation of hot water at 80 °C.

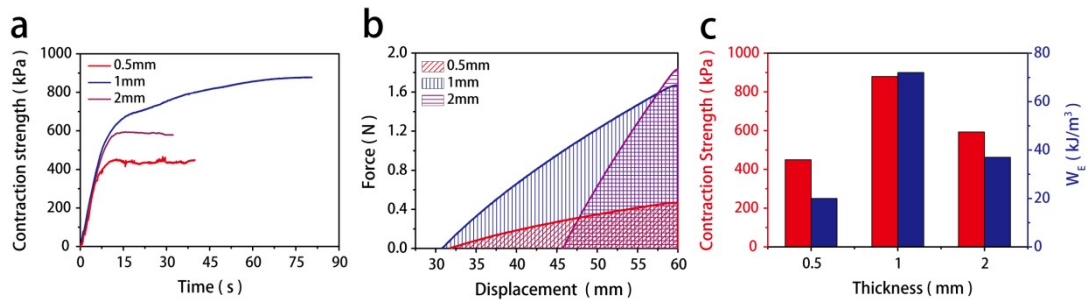

Fig.S7. (a) **Contraction** strength of 300% EDDH **placed for different time with different thicknesses** as a function of stimulation time. (b) Force-displacement curves of 300% EDDH **placed for different time with different thicknesses**. (c) **Contraction** strength and output working density  $W_E$  of 300% EDDH **placed for different time with different thicknesses**.

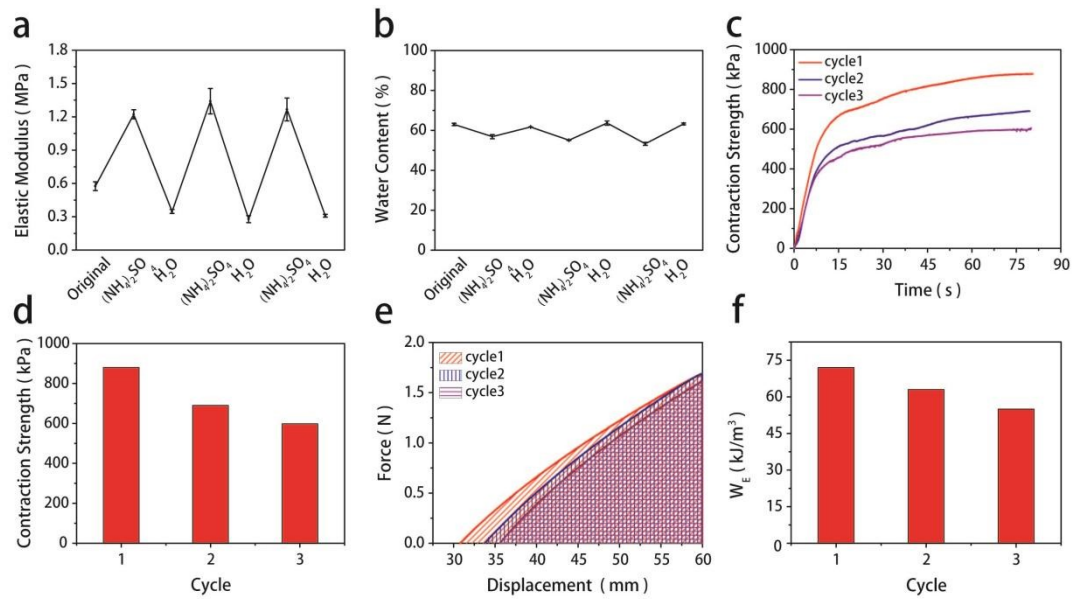

Fig.S8. (a) Elastic modulus of GA<sub>7.5</sub>-PVA<sub>30</sub>-S<sub>25</sub> gel during three cycles. (b) Water content of GA<sub>7.5</sub>-PVA<sub>30</sub>-S<sub>25</sub> gel during three cycles. (c) Contraction strength of 300% EDDH as a

function of stimulation time. (d) Contraction strength of 300% EDDH. (e) Force-displacement curves of 300% EDDH. (f) Output working density  $W_E$  of 300% EDDH.
